# Supplementary material for: In situ synthesized Pd nanoparticles supported on B-MCM-41: an efficient catalyst for hydrogenation of nitroaromatics in supercritical carbon dioxide
Source: Royal Society of Chemistry journal article supplement (doi:10.1039/c2gc36160d), 2012-01-01

***In-situ* synthesized Pd nanoparticles supported on B-MCM-41: An efficient catalyst for nitroaromatics hydrogenation in supercritical carbon dioxide**

Maya Chatterjee,\* Takayuki Ishizaka, Toshishige Suzuki, Akira Suzuki, Hajime Kawanami\*

*Research Center for Compact Chemical System, AIST Tohoku, 4-2-1 Nigatake, Miyagino-ku, Sendai, 983-8551, Japan, Tel.: +81-22-237-5213, FAX: +81- 22-237-5388; E-mail: [c-maya@aist.go.jp](mailto:c-maya@aist.go.jp); h-kawanami@aist.go.jp*

**Fig. 1s:** Thermogravimetric analysis of Pd/B-MCM-41 of different Si/B ratio

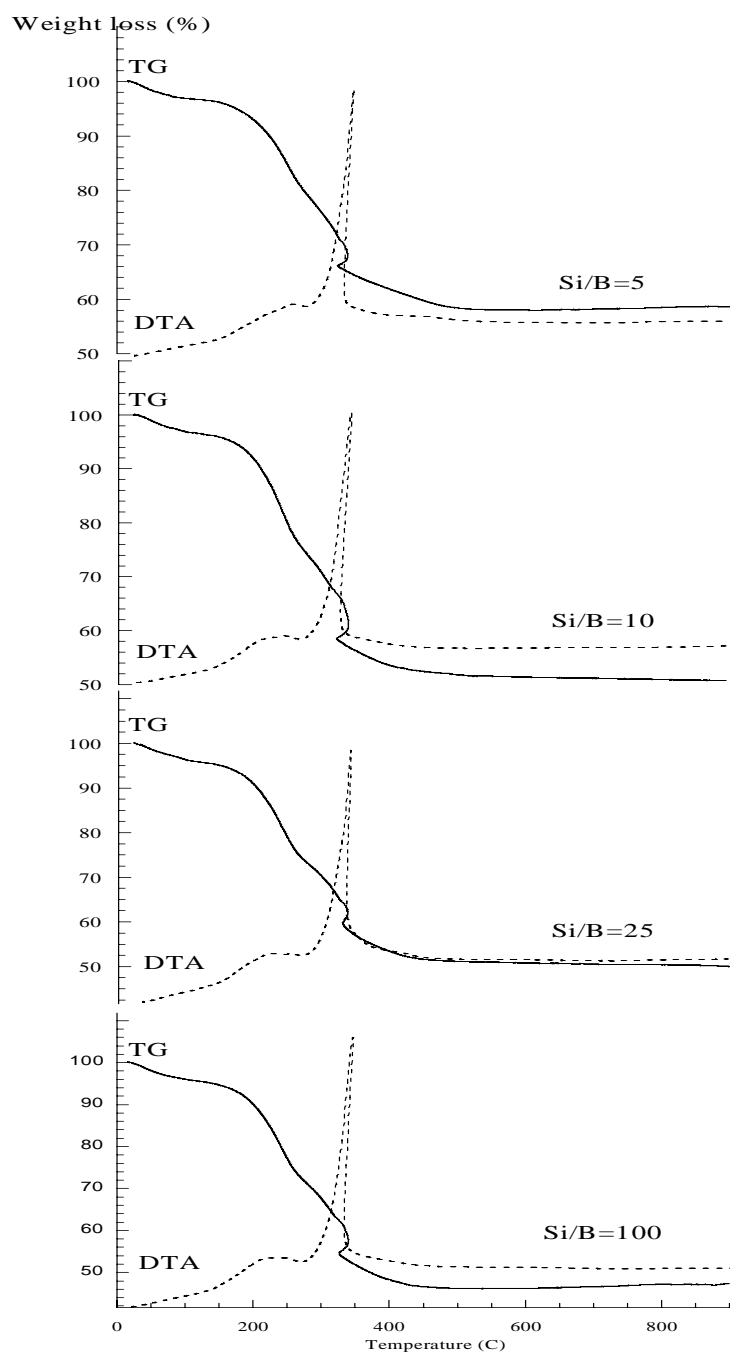

### Phase change observations

*Method:* Visual observation of phase behaviour of nitrobenzene in scCO<sub>2</sub> under the studied reaction condition was conducted separately using a 10 ml high pressure view cell fitted with a sapphire window. The cell was placed over a magnetic stirrer for stirring the content and connected to a pressure controller, to regulate the pressure inside the view cell. In addition, temperature controller was used to maintain the desired temperature of 50 °C. In the beginning, nitrobenzene was introduced into the view cell (mentioned as 'initial' in the Fig. 2s) at a constant H<sub>2</sub> pressure of 2 MPa while CO<sub>2</sub> pressure was varied in the range of 7-14 MPa and the phase behaviour of nitrobenzene-H<sub>2</sub>-CO<sub>2</sub> system was monitored.

**Fig.2s:** Phase change observations of nitrobenzene at 50 °C and P<sub>H<sub>2</sub></sub>= 2. MPa (a) initial (b) 8, (c) 10 and (d) 12 MPa of CO<sub>2</sub> pressure.

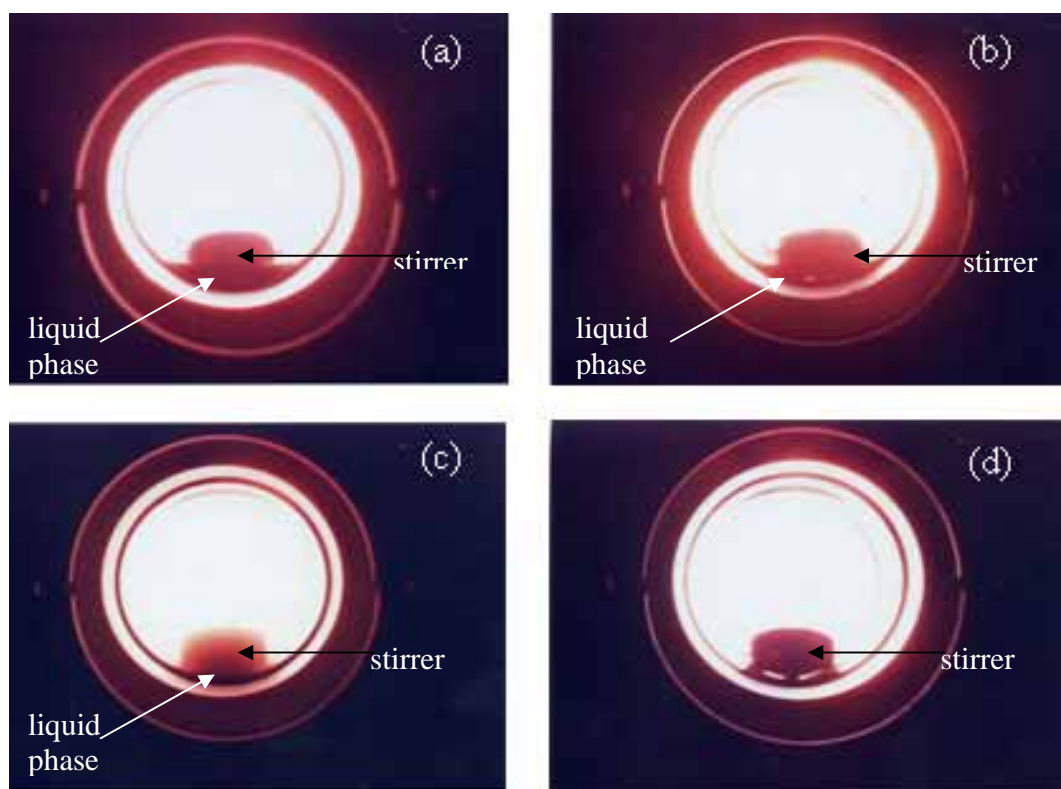

**Fig. 3s:** XRD pattern of Pd/Al-MCM-41 and Pd/Ga-MCM-41 (a) low angle and (b) higher angle

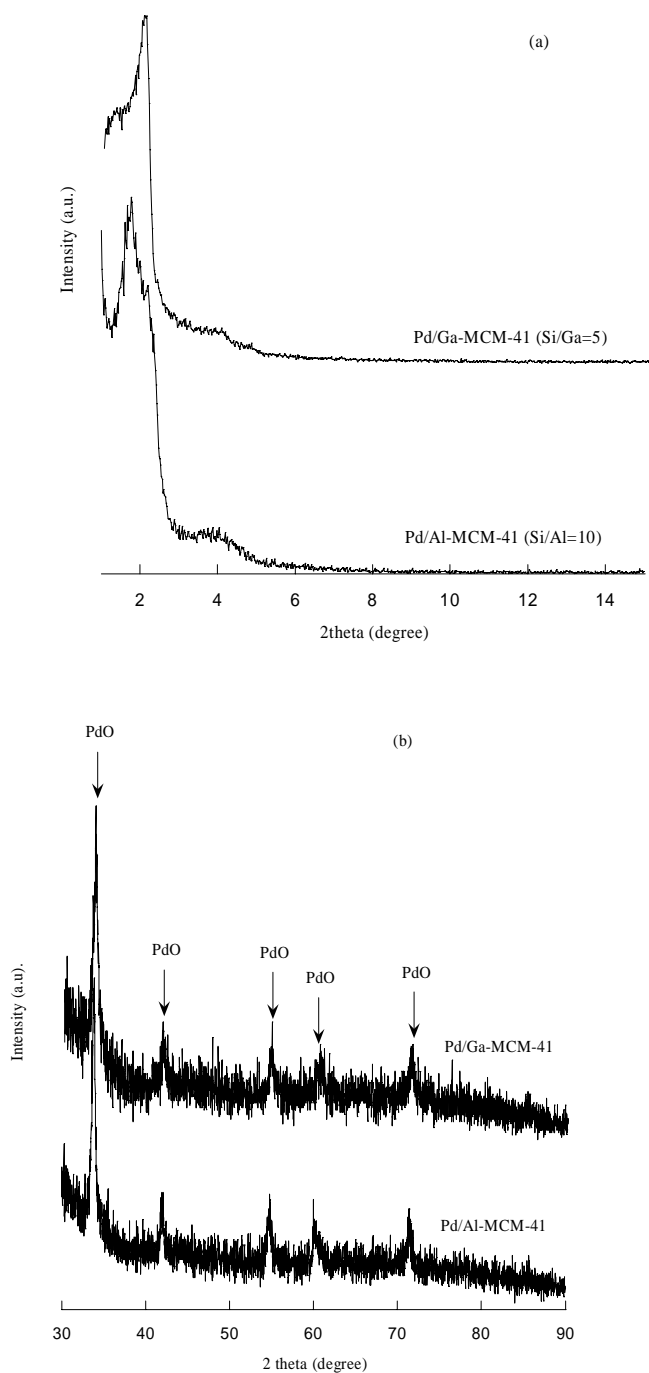

**Fig. 4s:** TEM image after (a) 4<sup>th</sup> and (b) 8<sup>th</sup> recycle. Before recycling the catalyst was separated from product by filtration.

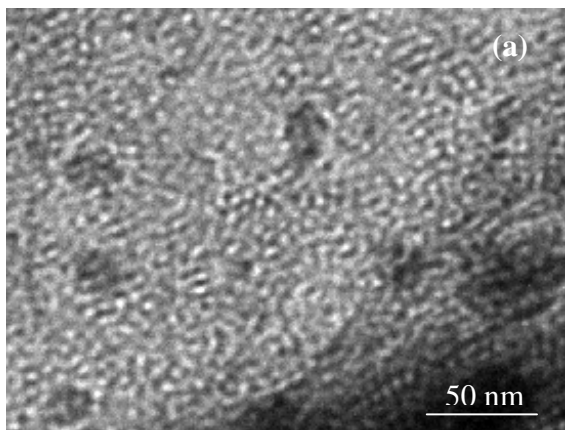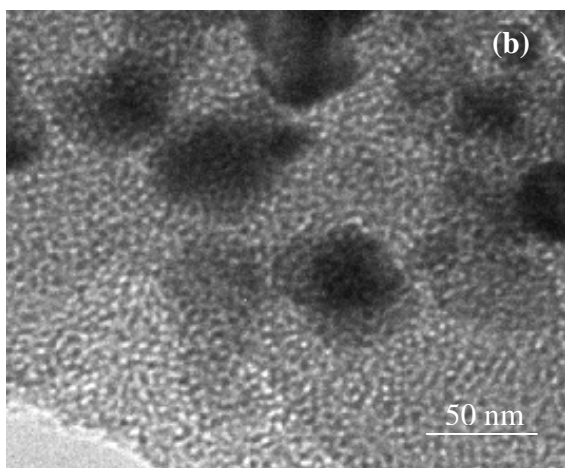

Supplement: c2gc36160d.pdf [file c2gc36160d.pdf]
